37. Murphy GS, Szokol JW, Avram MJ, Greenberg SB, Shear T, Vender JS, Gray J, Landry E: Postoperative residual neuromuscular blockade is associated with impaired clinical recovery. *Anesth Analg* 2013; 117:133–41
38. Kopman AF, Yee PS, Neuman GG: Relationship of the train-of-four fade ratio to clinical signs and symptoms of residual paralysis in awake volunteers. *ANESTHESIOLOGY* 1997; 86:765–71
39. Murphy GS, Szokol JW, Avram MJ, Greenberg SB, Shear TD, Vender JS, Parikh KN, Patel SS, Patel A: Residual neuromuscular block in the elderly: Incidence and clinical implications. *ANESTHESIOLOGY* 2015; 123:1322–36
40. Kirkegaard-Nielsen H, Helbo-Hansen HS, Lindholm P, Severinsen IK, Bülow K: Time to peak effect of neostigmine at antagonism of atracurium- or vecuronium-induced neuromuscular block. *J Clin Anesth* 1995; 7:635–9

## ANESTHESIOLOGY REFLECTIONS FROM THE WOOD LIBRARY-MUSEUM

### America Helps Germany in “the Battle for Borocaine”

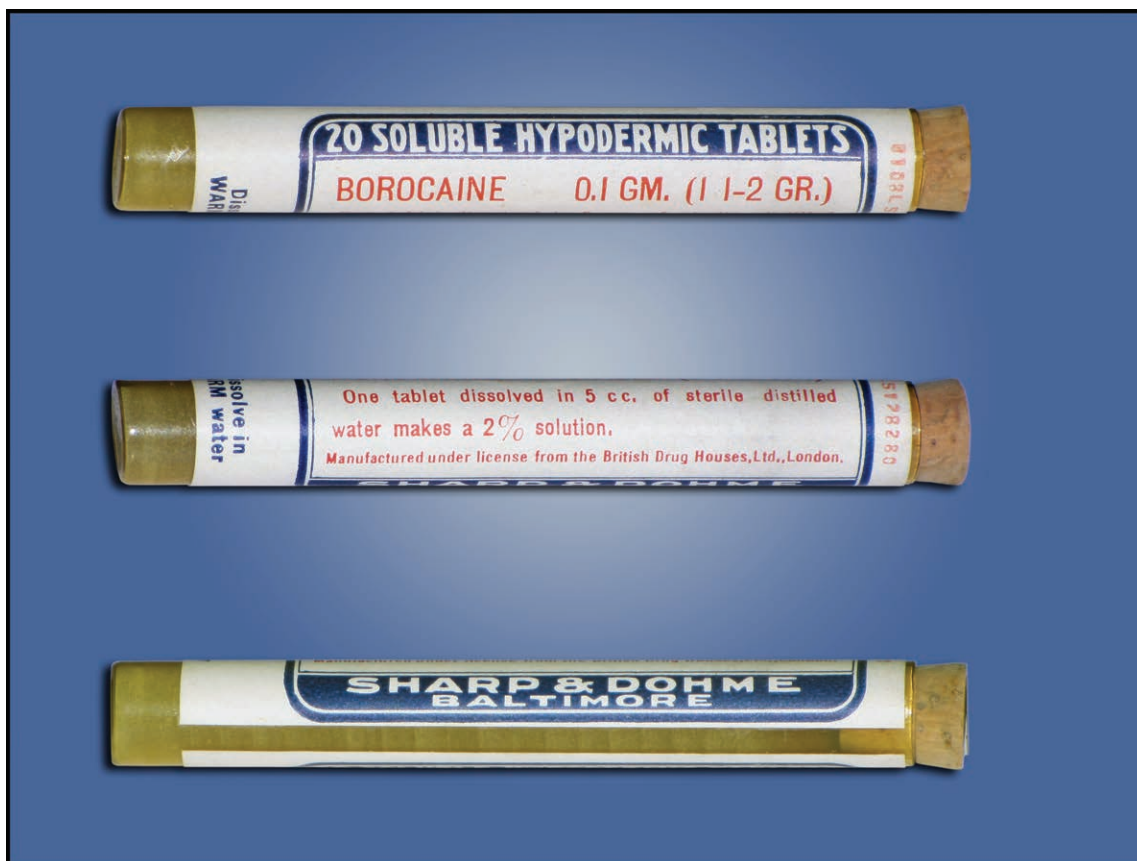

Manufactured by Sharp & Dohme of Baltimore, each corked vial (above) contained 20 soluble hypodermic tablets of Borocaine “under license from the British Drug Houses, Ltd., London.” Because each tablet contained 0.1 g of procaine borate, dissolving a tablet in 5 ml of sterile water yielded a 2% solution of this ester local anesthetic. Unfortunately for Borocaine’s British licensing firm, the American Medical Association’s Chemical Laboratory determined that the “formula  $2(C_{13}H_{20}O_2N_2), 4H_2O, 5B_2O_3$ , as given by the manufacturer...is incorrect; on the other hand, it appears that borocaine has the formula  $C_{13}H_{20}O_2N_2 \cdot 5HBO_2$ ” and is “identical to the one first prepared by Einhorn and Uhfelder some years ago” in Germany. And this is how America helped Germany in “the Battle for Borocaine.” (Copyright © the American Society of Anesthesiologists’ Wood Library-Museum of Anesthesiology.)

George S. Bause, M.D., M.P.H., *Honorary Curator and Laureate of the History of Anesthesia, Wood Library-Museum of Anesthesiology, Schaumburg, Illinois, and Clinical Associate Professor, Case Western Reserve University, Cleveland, Ohio.* UJYC@aol.com.
